# Supplementary material for: Production of Resveratrol Glucosides and Its Cosmetic Activities
Source: Preprints.org preprint supplement (doi:10.20944/preprints202305.1975.v1), 2023-05-29
Supplement: Supplementary file 1 [file supplementary]

**Cosmetics MDPI**

Supporting information for

**Production of resveratrol glucosides and its cosmetic activities**

Samir Bahadur Thapa<sup>1</sup>, Juhee Jeon<sup>3</sup>, Byung Gyu Park<sup>3</sup>, Dabin Shim<sup>4</sup>, Chang Seok Lee<sup>4</sup>, Jae Kyung Sohng<sup>1,2</sup>

1. *Department of Life Science and Biochemical Engineering, Sun Moon University, 70 Sunmoon-ro 221, Tangjeong-myeon, Asan-si, Chungnam 31460, Korea*

2. *Department of Pharmaceutical Engineering and Biotechnology, Sun Moon University, 70 Sunmoon-ro 221, Tangjeong-myeon, Asan-si, Chungnam 31460, Korea*

3. *ACTIVON Co., Ltd, 46-5, Dureungyuri-ro, Ochang-eup, Cheongwon-gu, Cheongju-si, Chungcheongbuk-do, 28104, Korea*

4. *Department of Beauty and Cosmetic Science, Eulji University, 553 Sanseong-daero,*

5. *Sujeong-gu, Seongnam, Gyeonggi-do, 13135, Korea*

**\*Corresponding author:**

Prof. Jae Kyung Sohng

Tel: +82(41)530-2246

Fax: +82(41)530-8229

Email: sohng@sunmoon.ac.kr

23       **Contents**

24       **Figure S1.** Vector map of recombinant construct used in this study.

25       **Figure S2.** . SDS-PAGE of protein DgAS. M: marker; Lane 1: Control BL-21(DE3); Lane 2: crude  
26       enzyme produced in *E. coli* BL-21(DE3); Lane 3: purified enzyme.

27       **Figure S3.** Conversion percentage of resveratrol glucosides at different time interval.

28       **Figure S4.** HPLC analysis of resveratrol reaction mixtures in different concentrations of  
29       resveratrol.

30       **Figure S5.** Conversion of resveratrol to its glucosides with different sugar donors and commercial  
31       transglycosylation enzyme, CGTase.

32       **Figure S6.** HPLC analysis of large scale in vitro resveratrol reaction mixture at different time  
33       points;- (i) 3 h, (ii) 4 h, (iii) 5 h, and (iv) Standard resveratrol.

34       **Figure S7.** Structural Elucidation of resveratrol-*O*-glucosides products

35       **Table 1.**<sup>1</sup>H-NMR analysis of resveratrol glucosides

36       **Table 2.** <sup>13</sup>C-NMR analysis of resveratrol glucosides

37

38 **Figure S1.** Vector map of recombinant construct used in this study.

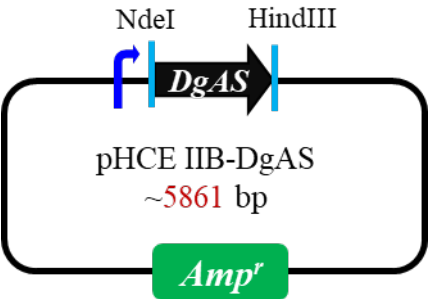

39

40

41 **Figure S2.** . SDS-PAGE of protein DgAS. M: marker; Lane 1: Control BL-21(DE3); Lane 2: crude  
42 enzyme produced in BL-21(DE3); Lane 3: purified enzyme.

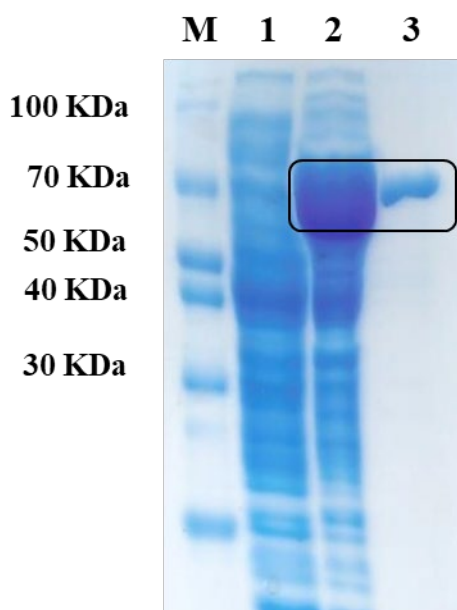

43  
44  
45  
46

47 **Figure S3.** Conversion percentage of resveratrol glucosides at different time interval.

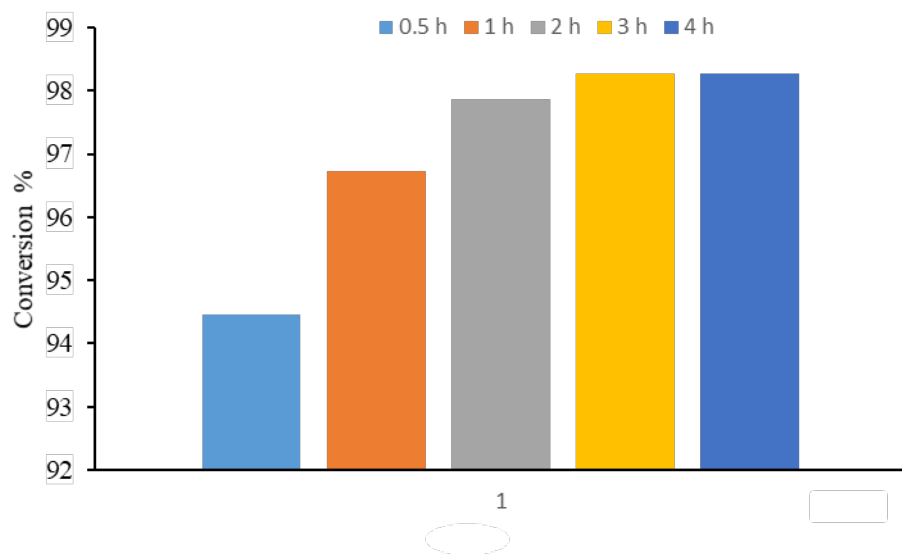

48

49

50 **Figure S4.** HPLC analysis of resveratrol reaction mixtures in different concentrations of  
51 resveratrol.

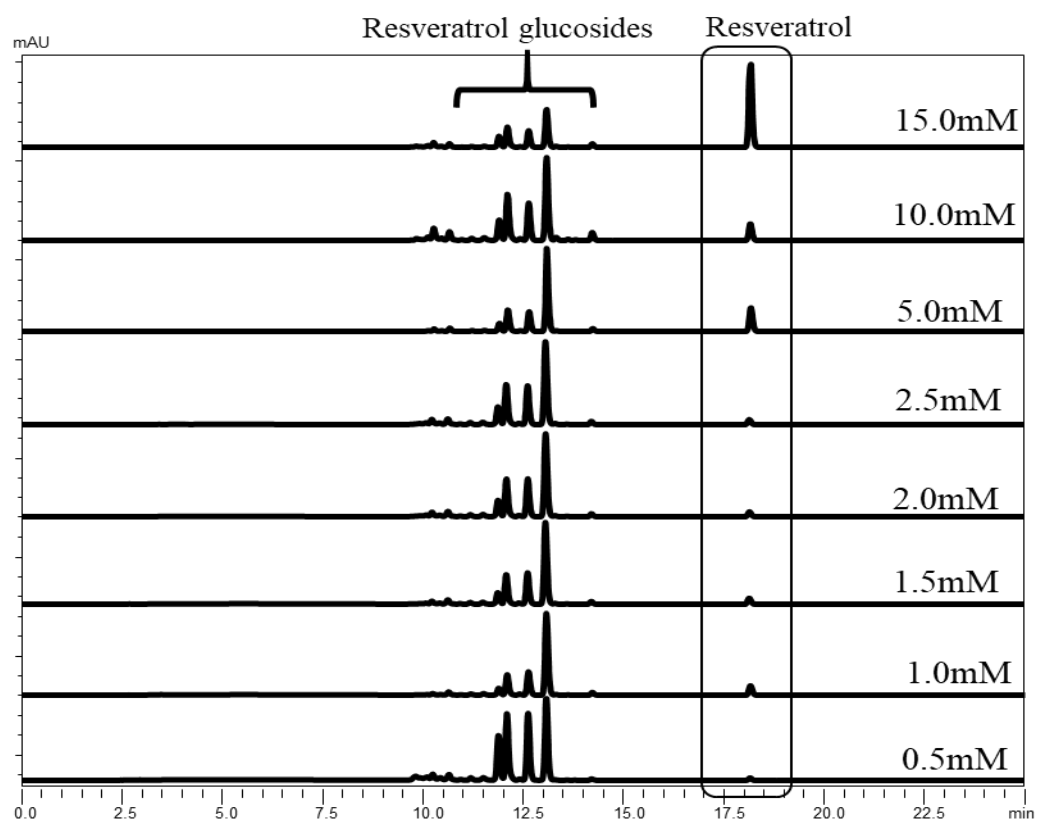

**Figure S5.** Conversion of resveratrol to its glucosides with different sugar donors and commercial tansglycosylation enzyme, CGTase.

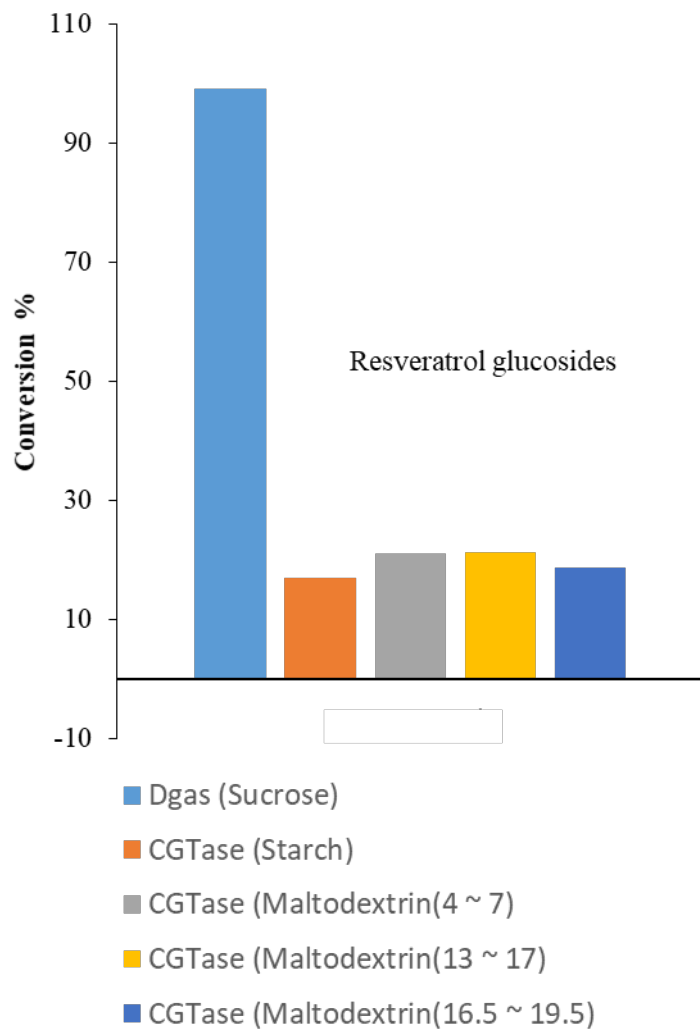

63 **Figure S6.** HPLC analysis of large scale in vitro resveratrol reaction mixture at different time  
64 points;- (i) 3 h, (ii) 4 h, (iii) 5 h, and (iv) Standard resveratrol.

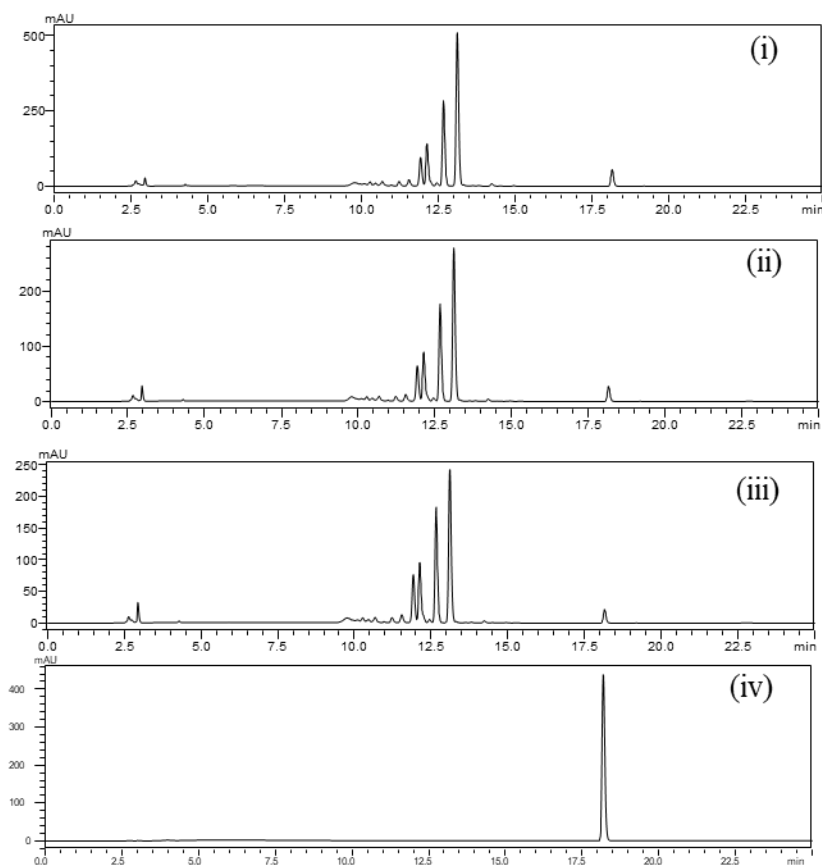

65

66



67 **Figure S7. Structural Elucidation of resveratrol-*O*-glucosides products**

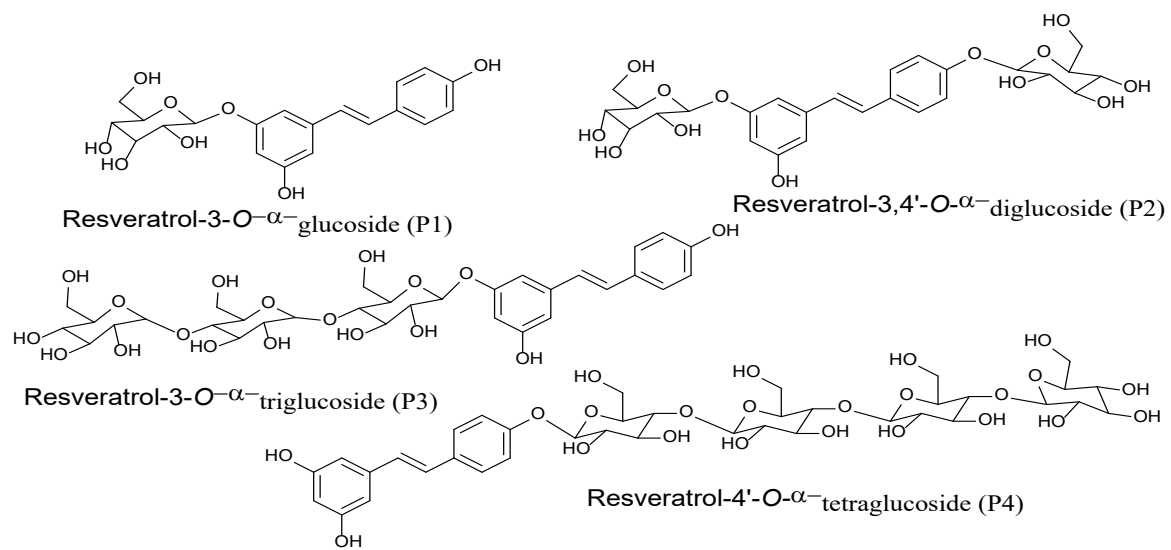

68

69

70 **Table 1.** <sup>1</sup>H-NMR analysis of resveratrol glucosides

| Proton/ $\delta$ ppm | Resveratrol | P1               | P2               | P3               | P4               |
|----------------------|-------------|------------------|------------------|------------------|------------------|
| 1                    | -           | -                | -                | -                | -                |
| 2                    | 6.46        | 5.4              | 6.49             | 5.30             | 5.08             |
| 3                    | -           | -                | -                | -                | -                |
| 4                    | 6.15        | -                | 6.39             | -                | -                |
| 5                    | -           | -                | --               | -                | -                |
| 6                    | 6.46        | 6.13             | 6.56             | 6.14             | 5.47             |
| 7                    | 6.86        | 7.07             | 6.74             | 6.42             | 6.93             |
| 8                    | 6.96        | 7.51             | 7.40             | 7.14             | 7.14             |
| 1'                   | -           | -                | -                | -                | -                |
| 2'                   | 7.34        | 7.51             | 7.66             | 7.54             | 7.53             |
| 3'                   | 6.81        | 6.40             | 6.87             | 6.97             | 7.13             |
| 4'                   | -           | -                | 7.01             | -                | -                |
| 5'                   | 6.82        | 6.93             | 6.76             | 6.94             | 7.00             |
| 6'                   | 7.36        | 7.51             | 7.40             | 7.52             | 7.51             |
| 7-OH                 | 8.18        | -                | -                | -                | 9.23             |
| 5-OH                 | 8.18        | 9.23             | 9.04             | 9.25             | 9.23             |
| 4'-OH                | 6.94        | 7.49             | -                | 7.12             | -                |
| 1''                  | -           | 5.34(d, J=3.7Hz) | 5.34(d, J=3.7Hz) | 4.85(d, J=3.6Hz) | 4.72(d, J=3.6Hz) |
| Sugar protons        | -           | 3.15-3.62        | 3.20-3.36        | 3.13-3.71        | 3.20-3.36        |

78 **Table 2.**  $^{13}\text{C}$ -NMR analysis of resveratrol glucosides

| C position/ppm | Resveratrol | P1          | P2          | P3          | P4          |
|----------------|-------------|-------------|-------------|-------------|-------------|
| 1              | 140.47      | 139.34      | 139.35      | 139.35      | 138.91      |
| 2              | 105.73      | 103.26      | -           | 103.26      | 101.92      |
| 3              | 159.21      | 158.36      | 158.37      | 158.37      | 158.35      |
| 4              | 102.41      | 97.83       | 97.84       | 97.84       | 99.91       |
| 5              | 159.21      | 158.51      | 158.53      | 158.53      | 158.40      |
| 6              | 105.73      | 105.61      | 103.26      | 105.60      | 104.37      |
| 7              | 126.97      | -           | 118.79      | 118.75      | 127.18      |
| 8              | 128.73      | 125.22      | 125.24      | 125.24      | 127.40      |
| 1'             | 129.41      | 128.45      | 128.46      | 128.46      | 131.06      |
| 2'             | 128.73      | 127.88      | 127.89      | 127.89      | 127.50      |
| 3'             | 116.07      | 115.51      | 115.51      | 115.51      | 117.62      |
| 4'             | 158.36      | 157.29      | 157.29      | 157.29      | 156.87      |
| 5'             | 116.07      | 107.08      | 107.08      | 107.08      | 117.08      |
| 6'             | 128.73      | 127.95      | 127.96      | 127.96      | 127.64      |
| 1''            | -           | 97.77       | 97.76       | 98.34       | 98.45       |
| Sugar carbon   | -           | 73.62-59.25 | 73.64-59.25 | 73.64-59.25 | 73.64-60.78 |

79

80
